# Supplementary material for: Compositional engineering of the pi-conjugated small molecular VOPcPhO : Alq3 complex to boost humidity sensing
Source: Royal Society of Chemistry journal article supplement (doi:10.1039/c7ra02525d), 2017-01-01
Supplement: c7ra02525d1.pdf [file c7ra02525d1.pdf]

## SUPPLEMENTARY DATA

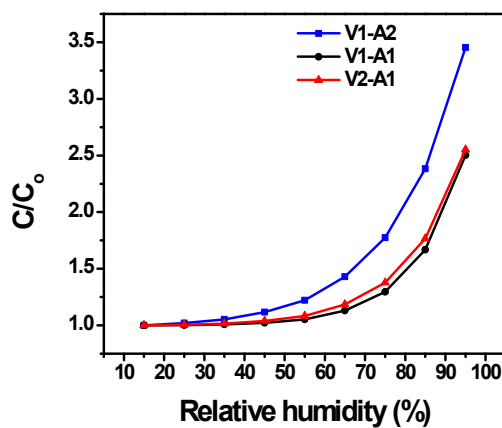

Figure S1: Dynamic variation of different composites (VoPcPho:Alq<sub>3</sub>) Capacitance to Relative Humidity at 100Hz and °C. Whereas on y-axis, C and C<sub>0</sub> represent the capacitance at any certain humidity level and capacitance at 15 %RH, respectively.

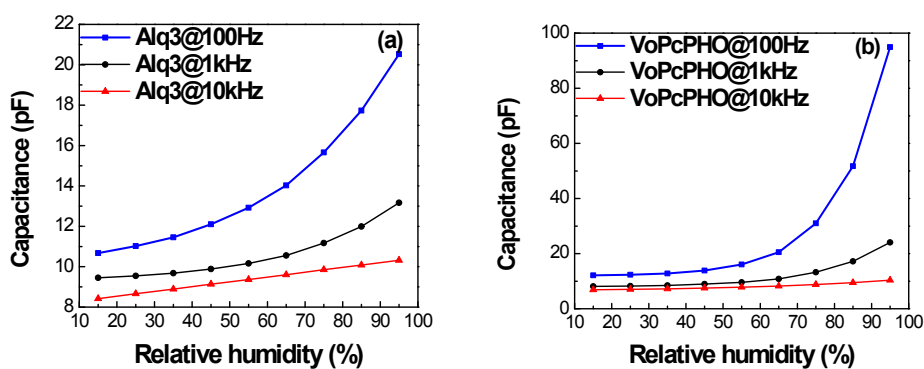

Figure S2: Dynamic variation of (a) Alq<sub>3</sub> and (b) VOPcPhO Capacitance to Relative Humidity at different frequencies

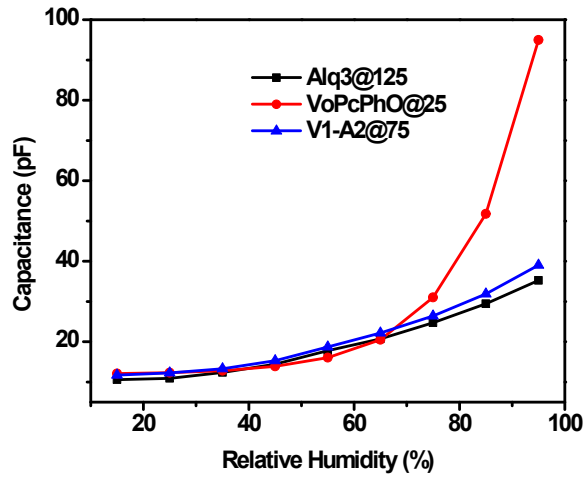

Figure: S3 Capacitance to Humidity sensing behavior best selected layers of of Alq<sub>3</sub> (b) VoPcPho and (c) composite

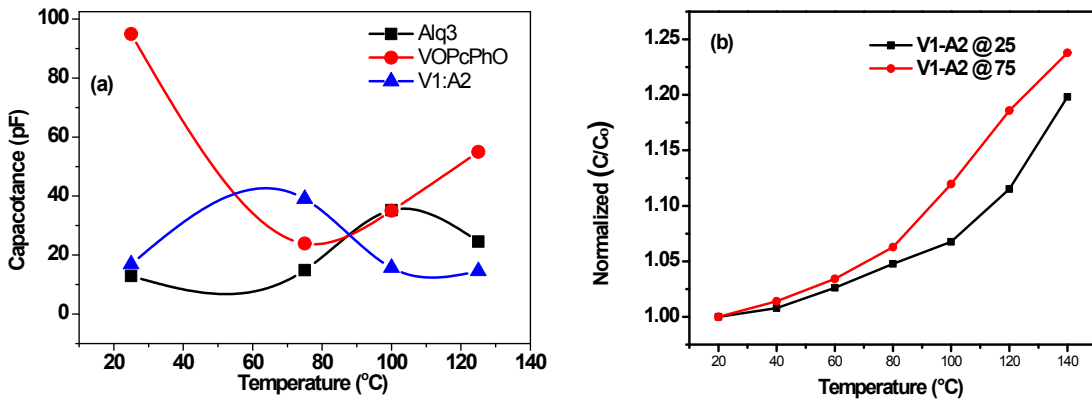

Figure S4 (a) Annealing temperature vs capacitance graph @ 90 %RH, (b) Normalized capacitance to temperature response of the desired composite at (a) 25 °C and (b) 75 °C.
